# Supplementary material for: Fatigue Induced Changes in Muscle Strength and Gait Following Two Different Intensity, Energy Expenditure Matched Runs
Source: PubMed Central journal article supplement (PMC7188949; doi:10.3389/fbioe.2020.00360), 2020-04-22
Supplement: Table_1.pdf [file Table_1.pdf]

Supplementary table 1. Standard error of measurement (SEM), Percentage of SEM expressed as the mean (SEM%), and minimum detectable change (MDC) values for strength measures of hip and knee musculature.

| Force Production measures | ICC  | SEM   | SEM % | MDC   |
|---------------------------|------|-------|-------|-------|
| Hip Abduction             | 0.84 | 0.031 | 6.2%  | 0.087 |
| Hip Adduction             | 0.86 | 0.031 | 9.7%  | 0.086 |
| Hip Internal Rotation     | 0.81 | 0.023 | 9.8%  | 0.064 |
| Hip External Rotation     | 0.84 | 0.014 | 7.2%  | 0.086 |
| Hip Flexion               | 0.81 | 0.035 | 8.7%  | 0.098 |
| Hip Extension             | 0.77 | 0.038 | 11.6% | 0.106 |
| Knee Extension            | 0.86 | 0.043 | 8.6%  | 0.118 |
| Knee Flexion              | 0.88 | 0.030 | 11.4% | 0.183 |

All measures are normalized to body weight  $\text{kg.kg}^{-1}$
