# Supplementary material for: Fatigue Induced Changes in Muscle Strength and Gait Following Two Different Intensity, Energy Expenditure Matched Runs
Source: PubMed Central journal article supplement (PMC7188949; doi:10.3389/fbioe.2020.00360), 2020-04-22
Supplement: Table_3.pdf [file Table_3.pdf]

Supplementary Table 3. Comparison Standard Error of Measurement (SEM), Minimum Detectable Changes (MDC) for spatiotemporal parameters of stride frequency (SF), stride length (SL) and contact time (CT) in both run-types.

|    |      | SEM   | MDC   |
|----|------|-------|-------|
| SF | HIIT | 2.838 | 7.866 |
|    | MICR | 2.271 | 6.296 |
| SL | HIIT | 0.027 | 0.074 |
|    | MICR | 0.026 | 0.073 |
| CT | HIIT | 0.008 | 0.023 |
|    | MICR | 0.009 | 0.025 |
